# Supplementary material for: The Expression Profile and Textural Characteristics of C595-Reactive MUC1 in Pancreatic Ductal Adenocarcinoma for Targeted Radionuclide Therapy
Source: PubMed Central journal article supplement (PMC7796161; doi:10.3390/cancers13010061), 2020-12-28
Supplement: cancers-13-00061-s001.pdf [file cancers-13-00061-s001.pdf]

# Supplementary Material: The Expression Profile and Textural Characteristics of C595-Reactive MUC1 in Pancreatic Ductal Adenocarcinoma for Targeted Radionuclide Therapy

Ashleigh Hull, Yanrui Li, Dylan Bartholomeusz, William Hsieh, Samantha Escarbe, Andrew Ruszkiewicz and Eva Bezak

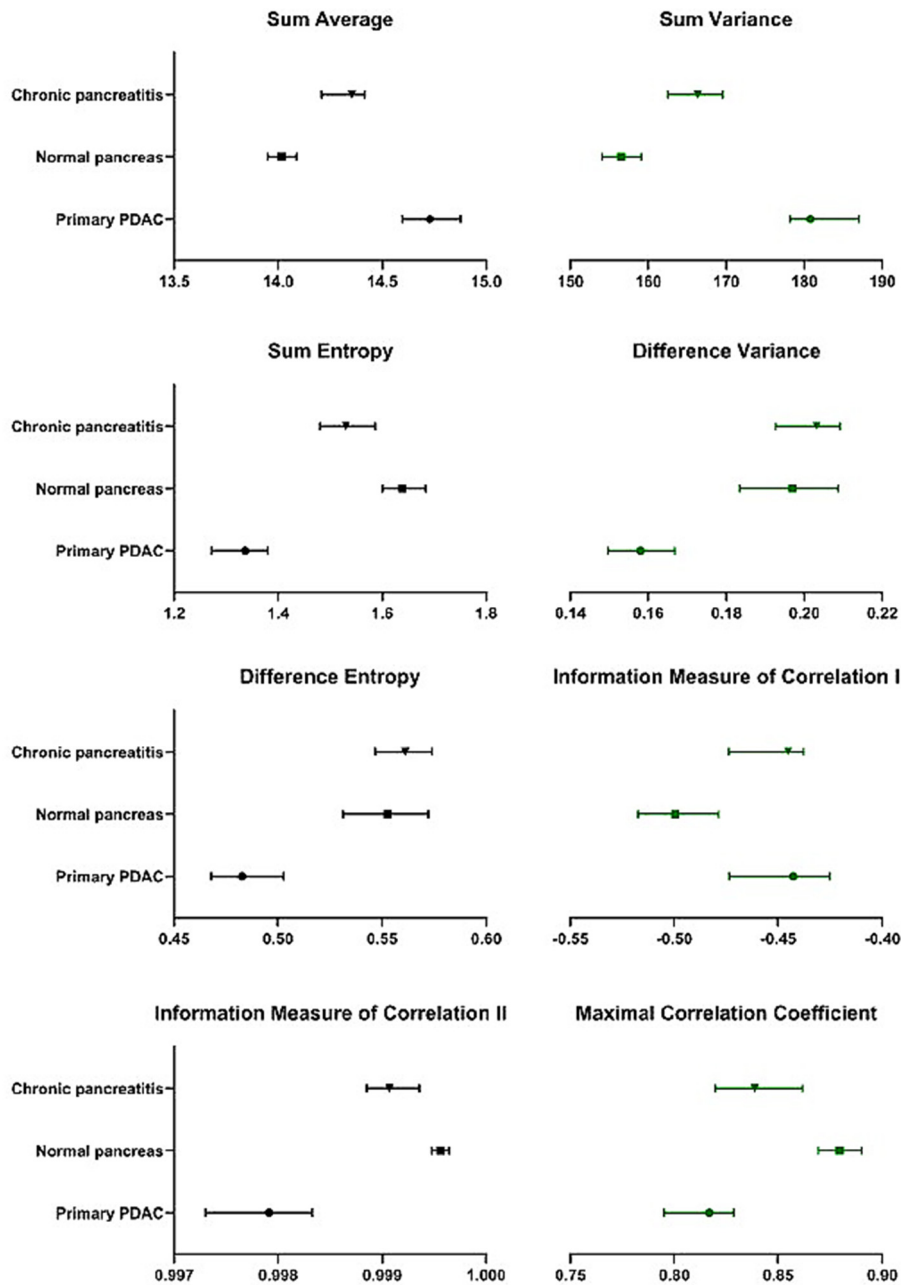

**Figure S1.** Median and 95% confidence intervals for derived Haralick features for PDAC, chronic pancreatitis and normal pancreas tissue samples.
